# Supplementary material
Source: MDPI journal article supplement (https://www.mdpi.com/2076-3417/11/1/358)
Supplement: s1 [file s1]

# Hydrophobic Anti-Reflective Coating of Plasma-Enhanced Chemical Vapor Deposited Diamond-Like Carbon Thin Films with Various Thickness for Dye-Sensitized Solar Cells <sup>†</sup>

Jae-Sil Song <sup>1,‡</sup>, Yong Seob Park <sup>2,‡</sup> and Nam-Hoon Kim <sup>1,\*</sup>

<sup>1</sup> Department of Electrical Engineering, Chosun University, Gwangju 61452, Korea; songjeasil@korail.com

<sup>2</sup> Department of Electronics, Chosun College of Science & Technology, Gwangju 61453, Korea; yongspark@cst.ac.kr

\* Correspondence: nhkim@chosun.ac.kr; Tel./Fax: +82-62-230-7028

<sup>†</sup> A preliminary version of this work is part of J.-S. Song's Ph.D. dissertation.

<sup>‡</sup> These authors contributed equally to this work.

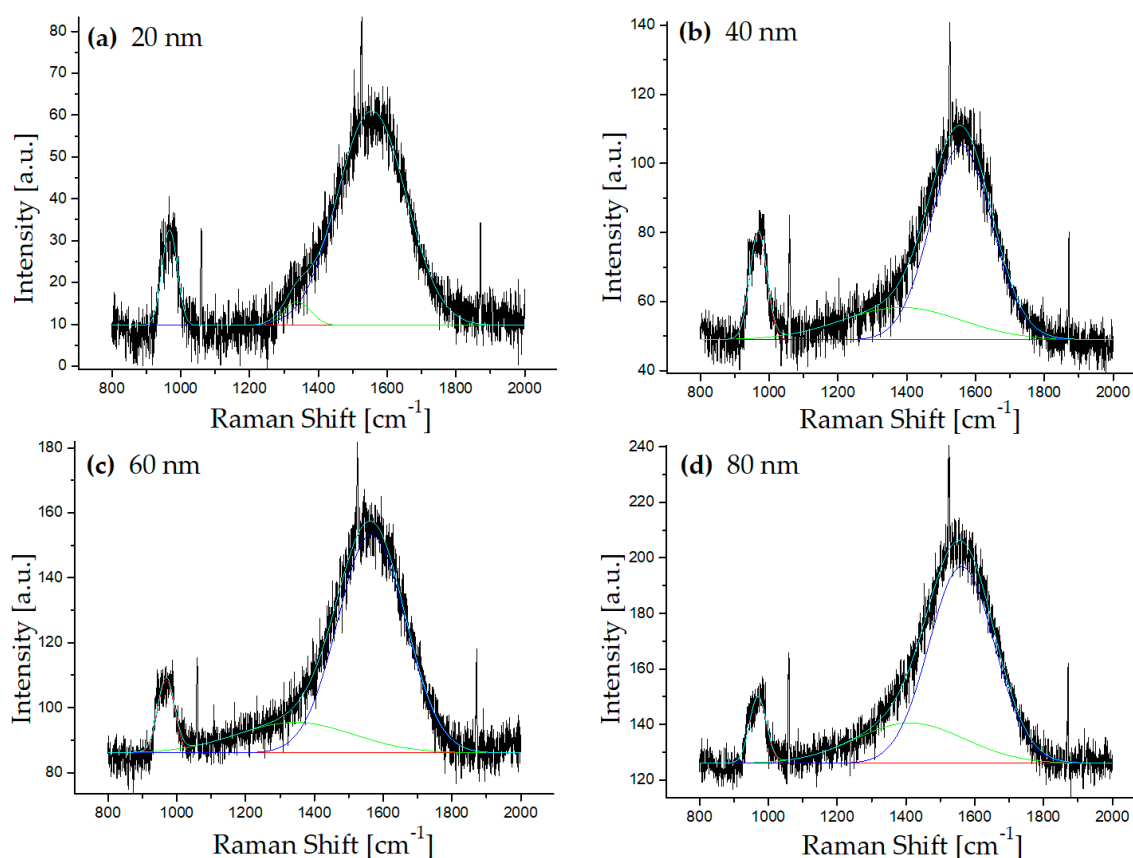

**Figure S1.** Gaussian fitting of Raman spectra for the RF-PECVD DLC thin films with various film thicknesses: (a) 20, (b) 40, (c) 60, and (d) 80 nm.

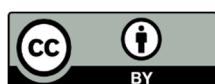

© 2021 by the authors. Submitted for possible open access publication under the terms and conditions of the Creative Commons Attribution (CC BY) license (<http://creativecommons.org/licenses/by/4.0/>).
